# Supplementary material for: Incremental parameter estimation of kinetic metabolic network models
Source: PubMed Central journal article supplement (PMC3568022; doi:10.1186/1752-0509-6-142), 2012-11-21
Supplement: 1752-0509-6-142-S2.pdf [file 1752-0509-6-142-S2.pdf]

# Incremental parameter estimation of kinetic metabolic network models

## Supplementary material

Gengjie Jia, Gregory N. Stephanopoulos and Rudiyanto Gunawan

**Table S1 - Parameter estimations of the branched pathway model using noise-free data and analytical slope values**

|                             | Simultaneous method                     |                                                                      | Incremental method                                                    |                                                                       |
|-----------------------------|-----------------------------------------|----------------------------------------------------------------------|-----------------------------------------------------------------------|-----------------------------------------------------------------------|
|                             | $\min \Phi_C$                           | $\min \Phi_S$                                                        | $\min \Phi_C$                                                         | $\min \Phi_S$                                                         |
| CPU time (sec) <sup>a</sup> | 56.00 hours <sup>b</sup>                | 785.79 <sup>c</sup><br>$\pm 50.80$ <sup>c</sup>                      | 256.43<br>$\pm 16.42$                                                 | 3.17<br>$\pm 4.72 \times 10^{-2}$                                     |
| eSSM GO iterations          | 323                                     | 5051<br>$\pm 307$                                                    | 19<br>$\pm 4$                                                         | 29<br>$\pm 4$                                                         |
| Parameter error             | 49.10%                                  | $4.93 \times 10^{-3}\%$<br>$\pm 2.84 \times 10^{-4}\%$               | $3.01 \times 10^{-5}\%$<br>$\pm 4.61 \times 10^{-6}\%$                | $1.96 \times 10^{-5}\%$<br>$\pm 7.63 \times 10^{-7}\%$                |
| $\Phi_C$ <sup>d</sup>       | <u><math>4.54 \times 10^{-3}</math></u> | $2.17 \times 10^{-6}$<br>$\pm 4.00 \times 10^{-9}$                   | <u><math>4.48 \times 10^{-9}</math></u><br>$\pm 3.31 \times 10^{-11}$ | $6.75 \times 10^{-9}$<br>$\pm 1.19 \times 10^{-10}$                   |
| $\Phi_S$ <sup>d</sup>       | $4.84 \times 10^{-2}$                   | <u><math>3.01 \times 10^{-6}</math></u><br>$\pm 2.57 \times 10^{-9}$ | $2.66 \times 10^{-8}$<br>$\pm 9.68 \times 10^{-10}$                   | <u><math>1.36 \times 10^{-8}</math></u><br>$\pm 6.17 \times 10^{-11}$ |

a. CPU time was based on a workstation with dual Intel Quad-Core 2.83 GHz processors.

b. Only one out of five runs was stopped with relative improvement of the objective function below 1% between iterations. **The rest did not converge within the 5-day time limit after iterating for 583, 989, 777, and 661 times. The corresponding  $\Phi_C$  at termination were  $4.85 \times 10^{-2}$ ,  $1.39 \times 10^{-2}$ ,  $1.75 \times 10^{-2}$  and  $3.75 \times 10^{-2}$ , respectively.**

c. Mean value and standard deviation ( $\pm$ ) out of five runs.

d. Root mean square error of model predictions, where the underlined value refers to the objective function of the minimization.

**Table S2 - Parameter estimates of the branched metabolic pathway model (simultaneous method)**

| *          | True Values<br>(Voit and Almeida, 2004) | Simultaneous method<br>$\min \Phi_S$ |         |         |         |
|------------|-----------------------------------------|--------------------------------------|---------|---------|---------|
|            |                                         | (1)                                  | (2)     | (3)     | (4)     |
| $\gamma_1$ | 20                                      | 19.9999                              | 22.0151 | 23.2163 | 20.9692 |
| $f_{13}$   | 0.8                                     | 0.8000                               | 0.6179  | 0.2340  | 0.3713  |
| $\gamma_2$ | 8                                       | 7.9998                               | 10.1122 | 6.5743  | 9.8968  |
| $f_{21}$   | 0.5                                     | 0.5000                               | 0.3498  | 0.5569  | 0.3599  |
| $\gamma_3$ | 3                                       | 2.9998                               | 5.1168  | 2.3392  | 4.9036  |
| $f_{32}$   | 0.75                                    | 0.7500                               | 0.5174  | 0.7568  | 0.5342  |
| $\gamma_4$ | 5                                       | 4.9998                               | 7.0401  | 2.7497  | 9.3560  |
| $f_{43}$   | 0.5                                     | 0.5000                               | 0.3262  | 0.4526  | 0.3054  |
| $f_{44}$   | 0.2                                     | 0.2000                               | 0.1135  | 0.0031  | 0.2082  |
| $\gamma_5$ | 2                                       | 2.0002                               | 1.5302  | 7.6821  | 4.2064  |
| $f_{51}$   | 0.5                                     | 0.4999                               | 0.8258  | 0.0003  | 0.1642  |
| $\gamma_6$ | 6                                       | 5.9997                               | 7.7990  | 8.4180  | 6.4270  |
| $f_{64}$   | 0.8                                     | 0.7999                               | 1.2250  | 0.0452  | 0.2945  |
| $X_3(t_0)$ | 1.2                                     | —                                    | —       | —       | 0.7548  |

\* This table reports the parameter estimates with the minimal objective function value out of five runs.

(1) using noise-free data and analytical slopes; (2) using noise-free data; (3) using noisy data; (4) using noise-free data with missing  $X_3$

**Table S3 - Parameter estimates of the branched metabolic pathway model (incremental method)**

| *          | True Values<br>(Voit and Almeida, 2004) | Incremental method<br>$\min \Phi_C$ |         |         |         | Incremental method<br>$\min \Phi_S$ |         |         |         |
|------------|-----------------------------------------|-------------------------------------|---------|---------|---------|-------------------------------------|---------|---------|---------|
|            |                                         | (1)                                 | (2)     | (3)     | (4)     | (1)                                 | (2)     | (3)     | (4)     |
| $\gamma_1$ | 20                                      | 20.0000                             | 20.0105 | 24.9989 | 13.4674 | 20.0000                             | 22.5904 | 15.0593 | 24.9585 |
| $f_{13}$   | 0.8                                     | 0.8000                              | 0.7634  | 0.3366  | 1.0920  | 0.8000                              | 0.6058  | 0.7824  | 0.4894  |
| $\gamma_2$ | 8                                       | 8.0000                              | 8.7730  | 14.1896 | 7.4143  | 8.0000                              | 10.3220 | 7.2424  | 10.1723 |
| $f_{21}$   | 0.5                                     | 0.5000                              | 0.4410  | 0.2610  | 0.5301  | 0.5000                              | 0.3417  | 0.4804  | 0.3479  |
| $\gamma_3$ | 3                                       | 3.0000                              | 3.6749  | 8.6709  | 2.5980  | 3.0000                              | 5.2978  | 2.8968  | 5.1604  |
| $f_{32}$   | 0.75                                    | 0.7500                              | 0.6680  | 0.3577  | 0.8098  | 0.7500                              | 0.5072  | 0.6827  | 0.5160  |
| $\gamma_4$ | 5                                       | 5.0000                              | 5.9268  | 10.9451 | 8.2781  | 5.0000                              | 7.2630  | 3.4761  | 7.0669  |
| $f_{43}$   | 0.5                                     | 0.5000                              | 0.4021  | 0.1585  | 0.8642  | 0.5000                              | 0.3213  | 0.4371  | 0.3023  |
| $f_{44}$   | 0.2                                     | 0.2000                              | 0.1719  | 0.0579  | 0.4950  | 0.2000                              | 0.1133  | 0.0338  | 0.1042  |
| $\gamma_5$ | 2                                       | 2.0000                              | 1.3828  | 0.3694  | 1.6768  | 2.0000                              | 1.6284  | 0.8468  | 3.2351  |
| $f_{51}$   | 0.5                                     | 0.5000                              | 0.8068  | 0.0000  | 1.2353  | 0.5000                              | 0.7753  | 1.4665  | 0.2243  |
| $\gamma_6$ | 6                                       | 5.9999                              | 7.3216  | 1.4041  | 15.0425 | 6.0000                              | 7.7068  | 11.1042 | 5.7002  |
| $f_{64}$   | 0.8                                     | 0.8000                              | 1.2352  | 0.6459  | 1.7137  | 0.8000                              | 1.1649  | 2.0000  | 0.3960  |
| $X_3(t_0)$ | 1.2                                     | —                                   | —       | —       | 0.7865  | —                                   | —       | —       | 1.2773  |

\* This table reports the parameter estimates with the minimal objective function value out of five runs.

(1) using noise-free data and analytical slopes; (2) using noise-free data; (3) using noisy data; (4) using noise-free data with missing  $X_3$

**Table S4 - Parameter estimates of the *L. lactis* metabolic model**

| *            | Simultaneous method      | Incremental method      |                         |
|--------------|--------------------------|-------------------------|-------------------------|
|              | $\min \Phi_S$            | $\min \Phi_C$           | $\min \Phi_S$           |
| $\gamma_1$   | 2.2638                   | 9.7891                  | 0.4994                  |
| $f_{1, Glu}$ | 0.0690                   | 0.2627                  | 0.8716                  |
| $f_{11}$     | 1.2991                   | 0.0309                  | -1.0343                 |
| $f_{14}$     | -0.5461                  | 0.3979                  | 0.9642                  |
| $\gamma_2$   | 0.2330                   | 49.9072                 | 49.9999                 |
| $f_{21}$     | 1.9573                   | 0.4358                  | 0.4404                  |
| $f_{2, ATP}$ | 0.9219                   | -0.3360                 | -0.8733                 |
| $\gamma_3$   | 5.8716                   | 8.3470                  | 5.9069                  |
| $f_{32}$     | 0.2739                   | 0.4571                  | 0.3602                  |
| $f_{3, Pi}$  | -0.1315                  | 0.1254                  | 0.0477                  |
| $\gamma_4$   | $1.5800 \times 10^{-13}$ | 49.6053                 | 0.4193                  |
| $f_{44}$     | $8.9194 \times 10^{-6}$  | 4.9730                  | 1.7635                  |
| $\gamma_5$   | 49.9999                  | 5.2494                  | 49.9999                 |
| $f_{53}$     | -0.4609                  | 3.4524                  | -0.0887                 |
| $\gamma_6$   | 3.3189                   | 11.0241                 | 8.2447                  |
| $f_{62}$     | 0.4006                   | 0.3926                  | 0.2874                  |
| $f_{64}$     | 0.1383                   | 0.0208                  | 0.2041                  |
| $f_{6, Pi}$  | -0.2920                  | 0.0279                  | -0.2545                 |
| $\gamma_7$   | 0.0001                   | 0                       | $3.0295 \times 10^{-5}$ |
| $f_{74}$     | 4.9999                   | $1.0855 \times 10^{-7}$ | 0.0005                  |
| $\gamma_8$   | $6.3648 \times 10^{-9}$  | 0.5332                  | 0.5332                  |
| $f_{85}$     | 1.7507                   | 0.1781                  | 0.1781                  |
| $f_{82}$     | 4.4842                   | 0.4804                  | 0.4804                  |
| $\gamma_9$   | 5.4359                   | 34.4010                 | 17.7804                 |
| $f_{95}$     | 0.5957                   | 0.4394                  | 0.3410                  |

\* This table reports the parameter estimates with the minimal objective function value out of five runs.

## REFERENCES

1. Voit, E.O. and Almeida, J. (2004) Decoupling dynamical systems for pathway identification from metabolic profiles, *Bioinformatics*, **20**, 1670-1681.
